# Supplementary material for: Aridity thresholds of soil microbial metabolic indices along a 3,200 km transect across arid and semi-arid regions in Northern China
Source: PeerJ. 2019 Apr 9;7:e6712. doi: 10.7717/peerj.6712 (PMC6461032; doi:10.7717/peerj.6712)
Supplement: Supplemental Information 1 [file peerj-07-6712-s001.xlsx]

## Sheet: Sheet1
Sites number	Longitude（°）	Latitude（°）	MAP（mm）
1	87.3772	42.2233	102
2	90.4256	42.9883	38
3	91.26	43.2678	62
4	91.912	43.4037	90
5	92.8127	43.1272	73
6	93.4595	42.9679	49
7	93.9815	42.6988	43
8	94.2789	42.2604	36
9	95.2972	41.5702	65
10	96.6742	40.5696	54
11	97.2649	40.1393	67
12	98.6556	39.8649	84
13	99.3433	40.245	68
14	100.461	41.1384	42
15	100.975	41.6631	34
16	101.706	42.0137	38
17	102.345	41.9636	49
18	103.114	41.7174	51
19	103.762	41.3573	53
20	104.447	40.876	93
21	104.881	40.7937	90
22	105.612	40.729	99
23	106.036	40.6903	118
24	107.002	41.4506	142
25	107.47	41.7962	151
26	107.611	41.8286	156
27	108.054	41.8661	173
28	108.711	41.9145	204
29	109.166	42.1628	189
30	109.805	42.4152	180
31	110.295	42.624	170
32	110.824	42.9319	152
33	111.355	43.1471	148
34	111.964	43.3818	148
35	112.196	43.6348	147
36	112.921	43.7071	180
37	113.466	43.819	199
38	114.086	43.8496	222
39	114.827	43.9794	246
40	115.702	43.926	271
41	116.507	44.2215	305
42	117.18	44.4666	324
43	117.896	44.6662	360
44	118.746	44.99	380
45	119.723	45.4268	420
46	120.477	46.3772	436
47	119.299	47.656	352
48	118.456	48.0888	285
49	117.979	48.3445	270
50	117.152	48.497	260
51	116.893	48.8575	262
52	117.091	49.3382	297
53	118.01	49.5293	318
54	118.533	49.7839	332
55	119.283	50.0538	362
56	119.994	49.879	406
MAP: mean annual precipitation
