# Supplementary material for: Aridity thresholds of soil microbial metabolic indices along a 3,200 km transect across arid and semi-arid regions in Northern China
Source: PeerJ. 2019 Apr 9;7:e6712. doi: 10.7717/peerj.6712 (PMC6461032; doi:10.7717/peerj.6712)
Supplement: Supplemental Information 2 — The soil respiration rate was expressed as the rate of CO2-C release per unit of soil mass and the rate of CO2-C release per unit of soil organic carbon, respectively. Basal soil respiration without glucose addition was named as Glu− and the substrate-induced respiration rate with glucose addition was named as Glu+. [file peerj-07-6712-s002.xlsx]

## Sheet: Sheet1
AI	GLU-(ugCO2-C.g-1SoilC.h-1)	GLU+(ugCO2-C.g-1SoilC.h-1)	GLU-(ugCO2-C.g-1Soil.h-1)	GLU+(ugCO2-C.g-1Soil.h-1)
0.0949721	289.157	532.762	0.573769	1.05715
0.0309194	542.609	578.794	0.598959	0.638903
0.0613254	1078.7	2046.12	0.699554	1.32694
0.0946372	281.851	481.341	0.564205	0.963542
0.0664845	347.282	638.342	0.814008	1.49624
0.042461	301.645	791.899	0.647422	1.69966
0.0368466	367.107	461.215	0.491177	0.617091
0.0299501	915.808	957.891	0.455555	0.476488
0.0654582	489.841	647.791	0.563879	0.745702
0.0480427	767.701	638.336	0.732335	0.608929
0.0637488	1239.78	1077.96	0.743869	0.646777
0.0782123	577.713	474.956	0.769113	0.632311
0.0606061	899.986	720.548	0.668149	0.534934
0.0366492	1304.88	1448	0.726315	0.805974
0.0295395	1276.54	1062.41	0.742105	0.617625
0.0329575	1087.88	1130.47	0.652725	0.678283
0.0441441	1072.5	1140.24	0.602379	0.640423
0.0445804	934.496	875.708	0.568615	0.532845
0.0455718	1266.76	1317.52	0.581647	0.604951
0.0946083	458.822	293.823	0.542791	0.347596
0.0880626	911.459	768.987	0.627915	0.529764
0.0965854	690.124	610.326	0.693885	0.613652
0.120285	488.892	625.513	0.623166	0.797311
0.159015	334.08	386.981	0.878698	1.01784
0.168904	328.75	449.705	0.749166	1.0248
0.175281	224.015	412.252	0.746653	1.37406
0.19011	348.909	526.856	0.71364	1.0776
0.233677	164.432	297.244	0.833468	1.50666
0.206107	262.215	401.87	0.890227	1.36436
0.192102	330.895	405.451	0.962333	1.17916
0.180467	472.94	655.827	0.975834	1.35319
0.15883	352.008	403.936	0.758102	0.869936
0.156614	199.084	278.578	0.853886	1.19484
0.160695	235.269	217.608	0.943987	0.873125
0.159609	262.665	549.912	0.575019	1.20385
0.20202	188.53	446.744	0.76597	1.81506
0.224352	253.363	410.781	0.953532	1.54597
0.254587	146.847	448.755	0.817981	2.4997
0.291815	142.677	424.29	0.998284	2.96869
0.31733	100.125	640.292	0.99793	6.38167
0.364397	83.4422	365.983	1.01519	4.45268
0.396088	81.8429	239.627	1.25817	3.68378
0.454545	58.3219	302.259	1.39899	7.25044
0.469716	63.8492	232.893	1.01263	3.69362
0.532995	43.2396	216.433	0.997138	4.9911
0.561856	50.3849	230.568	1.78687	8.17691
0.468708	43.2761	200.233	1.57647	7.29416
0.367742	68.9674	336.707	1.13933	5.56232
0.34264	90.5112	444.302	0.805027	3.95173
0.332907	142.373	508.477	0.924739	3.30265
0.338065	109.672	419.722	0.908921	3.47849
0.401351	84.0546	336.996	1.05122	4.21459
0.422872	83.835	359.319	0.786126	3.36936
0.440318	71.6808	281.715	0.95742	3.76279
0.483957	48.7528	376.773	1.0601	8.19271
0.449716	46.8307	192.945	2.08979	8.61002
AI: aridity index
Glu-: basal soil respiration without glucose addition
Glu+: substrate-induced respiration rate with glucose addition
