# Supplementary material for: Aridity thresholds of soil microbial metabolic indices along a 3,200 km transect across arid and semi-arid regions in Northern China
Source: PeerJ. 2019 Apr 9;7:e6712. doi: 10.7717/peerj.6712 (PMC6461032; doi:10.7717/peerj.6712)
Supplement: Supplemental Information 3 — Changes of carbon limitation index (CLI) with aridity index (AI), annual net primary productivity (ANPP), soil organic carbon content (SOC), and soil C:N ratio for soils from the 56 locations along the sampling transect. [file peerj-07-6712-s003.xlsx]

## Sheet: Sheet1
CLI	AI	ANPP(g/m2)	SOC(g/kg Soil)	Soil C/N ratio
1.84247	0.0949721	8.891	1.98428	6.20495
1.06669	0.0309194	0	1.10385	6.68203
1.89683	0.0613254	0	0.648514	2.81724
1.70779	0.0946372	0	2.00179	6.48126
1.83811	0.0664845	0	2.34394	6.09016
2.62527	0.042461	0	2.14631	8.8554
1.25635	0.0368466	0	1.33797	11.1332
1.04595	0.0299501	0	0.497435	6.97996
1.32245	0.0654582	13.197	1.15115	6.3098
0.83149	0.0480427	0	0.953933	9.95967
0.869478	0.0637488	0	0.6	6.08477
0.822131	0.0782123	0	1.33131	8.61556
0.800621	0.0606061	0	0.742399	11.9561
1.10968	0.0366492	0	0.556613	3.95399
0.83226	0.0295395	0	0.581344	2.85044
1.03916	0.0329575	0	0.6	9.74072
1.06316	0.0441441	0	0.561656	8.26982
0.937091	0.0445804	0	0.608473	3.15771
1.04006	0.0455718	0	0.45916	7.53789
0.640386	0.0946083	7.928	1.18301	7.07772
0.843688	0.0880626	16.969	0.688912	5.49945
0.884371	0.0965854	45.17	1.00545	8.06855
1.27945	0.120285	44.385	1.27465	5.98498
1.15835	0.159015	30.541	2.6302	5.14609
1.36793	0.168904	33.719	2.27884	6.842
1.84029	0.175281	48.745	3.33305	7.57989
1.51001	0.19011	42.708	2.04534	6.43851
1.8077	0.233677	56.369	5.06878	7.93401
1.5326	0.206107	59.393	3.39503	7.08248
1.22532	0.192102	28.671	2.90827	6.35093
1.3867	0.180467	45.654	2.06334	5.9869
1.14752	0.15883	99.688	2.15365	7.57546
1.3993	0.156614	37.298	4.28908	8.86297
0.924933	0.160695	46.564	4.01237	6.93004
2.09359	0.159609	54.173	2.18917	9.74647
2.36962	0.20202	111.175	4.06287	7.81424
1.62131	0.224352	144.177	3.7635	11.6842
3.05593	0.254587	94.875	5.5703	9.41518
2.97379	0.291815	164.839	6.99684	7.39721
6.39491	0.31733	113.991	9.96681	8.8111
4.38607	0.364397	164.991	12.1663	9.47595
2.92789	0.396088	133.168	15.373	9.68422
5.18261	0.454545	189.525	23.9875	9.73038
3.64755	0.469716	153.236	15.8597	11.1468
5.00543	0.532995	164.509	23.0607	11.8094
4.57612	0.561856	286.513	35.4643	11.3892
4.62688	0.468708	202.951	36.4283	10.7119
4.88211	0.367742	160.464	16.5198	9.56003
4.90881	0.34264	97.951	8.89423	9.37689
3.57144	0.332907	83.101	6.49518	10.2217
3.82705	0.338065	63.506	8.2876	9.44356
4.00925	0.401351	157.211	12.5064	10.785
4.28603	0.422872	118.62	9.37707	11.1637
3.93013	0.440318	129.708	13.3567	11.975
7.72825	0.483957	120.482	21.7444	12.4449
4.12004	0.449716	173.695	44.6243	12.4559
CLI: carbon limitation index
AI: aridity index
SOC: soil organic carbon
Soil C/N ratio: the ratio of soil organic carbon to soil organic nitrogen content
