# Supplementary material for: Aridity thresholds of soil microbial metabolic indices along a 3,200 km transect across arid and semi-arid regions in Northern China
Source: PeerJ. 2019 Apr 9;7:e6712. doi: 10.7717/peerj.6712 (PMC6461032; doi:10.7717/peerj.6712)
Supplement: Supplemental Information 4 — Variations and correlations of microbial metabolic quotient (qCO2) with aridity index (AI), mean annual temperature (MAT), Mean annual precipitation (MAP), annual net primary productivity (ANPP), soil C:N ratio, and soil organic carbon content (SOC) for soils from the 56 locations along the sampling transect. [file peerj-07-6712-s004.xlsx]

## Sheet: Sheet1
qCO2(mg g-1.MBC h-1)	AI	MAT（℃）	MAP（mm）	ANPP(g/m2)	Soil C/N ratio
26.0351	0.0949721	8.46	102	8.891	6.20495
24.1797	0.0309194	10.92	38	0	6.68203
10.0977	0.0613254	7.16	62	0	2.81724
5.32186	0.0946372	6.18	90	0	6.48126
26.3749	0.0664845	8.16	73	0	6.09016
9.09065	0.042461	9.06	49	0	8.8554
11.5668	0.0368466	9.38	43	0	11.1332
11.0226	0.0299501	9.93	36	0	6.97996
8.63637	0.0654582	5.27	65	13.197	6.3098
10.0452	0.0480427	8.125	54	0	9.95967
25.1644	0.0637488	7.22	67	0	6.08477
18.9547	0.0782123	8.13	84	0	8.61556
74.6031	0.0606061	8.65	68	0	11.9561
8.8126	0.0366492	8.72	42	0	3.95399
28.7695	0.0295395	8.825	34	0	2.85044
25.3608	0.0329575	8.73	38	0	9.74072
34.7288	0.0441441	7.72	49	0	8.26982
32.0075	0.0445804	8.39167	51	0	3.15771
29.6538	0.0455718	9	53	0	7.53789
62.548	0.0946083	6.13333	93	7.928	7.07772
9.30303	0.0880626	6.69167	90	16.969	5.49945
9.47694	0.0965854	6.925	99	45.17	8.06855
7.32116	0.120285	6.25	118	44.385	5.98498
5.05644	0.159015	4.46	142	30.541	5.14609
7.4024	0.168904	4.28	151	33.719	6.842
4.79204	0.175281	4.11	156	48.745	7.57989
3.95221	0.19011	4.47	173	42.708	6.43851
3.36086	0.233677	3.42	204	56.369	7.93401
4.96932	0.206107	4.59	189	59.393	7.08248
4.07454	0.192102	5.33	180	28.671	6.35093
7.70982	0.180467	5.29	170	45.654	5.9869
7.95921	0.15883	4.92	152	99.688	7.57546
4.88745	0.156614	4.27	148	37.298	8.86297
4.04575	0.160695	3.56	148	46.564	6.93004
3.54829	0.159609	3.5	147	54.173	9.74647
7.09898	0.20202	2.94	180	111.175	7.81424
7.76105	0.224352	2.72	199	144.177	11.6842
3.01097	0.254587	2.16	222	94.875	9.41518
2.68472	0.291815	1.13	246	164.839	7.39721
2.30961	0.31733	1.32	271	113.991	8.8111
3.31017	0.364397	1.02	305	164.991	9.47595
2.14467	0.396088	1.03	324	133.168	9.68422
2.19947	0.454545	0.51	360	189.525	9.73038
2.29813	0.469716	0.89	380	153.236	11.1468
1.44595	0.532995	0.42	420	164.509	11.8094
1.84236	0.561856	0.2	436	286.513	11.3892
1.72901	0.468708	-1.85	352	202.951	10.7119
1.80106	0.367742	-1.04	285	160.464	9.56003
1.8064	0.34264	-0.26	270	97.951	9.37689
2.88671	0.332907	0.18	260	83.101	10.2217
1.65925	0.338065	0.32	262	63.506	9.44356
2.71286	0.401351	-1.49	297	157.211	10.785
1.91757	0.422872	-1.48	318	118.62	11.1637
2.18131	0.440318	-1.47	332	129.708	11.975
2.39394	0.483957	-1.71	362	120.482	12.4449
2.56771	0.449716	-2.88	406	173.695	12.4559
qCO2: microbial metabolic quotient
AI: aridity index
MAT:mean annual temperature
MAP:mean annual precipitation
ANPP:annual net primary productivity
Soil C/N ratio: ratio of soil organic carbon to soil organic nitrogen content
SOC: soil organic carbon content
