# Supplementary material for: Aridity thresholds of soil microbial metabolic indices along a 3,200 km transect across arid and semi-arid regions in Northern China
Source: PeerJ. 2019 Apr 9;7:e6712. doi: 10.7717/peerj.6712 (PMC6461032; doi:10.7717/peerj.6712)
Supplement: Supplemental Information 5 — Variations of annual net primary productivity (ANPP), microbial biomass carbon (MBC) , and soil organic carbon content (SOC) along the aridity gradient (AI) for soils from the 56 locations along the sampling transect. [file peerj-07-6712-s005.xlsx]

## Sheet: Sheet1
AI	ANPP(g/m2)	MBC(mg/kg Soil)	SOC(g/kg Soil)
0.0949721	8.891	22.0383	1.98428
0.0309194	0	24.7712	1.10385
0.0613254	0	69.2786	0.648514
0.0946372	0	106.016	2.00179
0.0664845	0	30.863	2.34394
0.042461	0	71.2184	2.14631
0.0368466	0	42.4643	1.33797
0.0299501	0	41.329	0.497435
0.0654582	13.197	65.2912	1.15115
0.0480427	0	72.9036	0.953933
0.0637488	0	29.5603	0.6
0.0782123	0	40.5764	1.33131
0.0606061	0	8.95604	0.742399
0.0366492	0	82.4178	0.556613
0.0295395	0	25.7948	0.581344
0.0329575	0	25.7376	0.6
0.0441441	0	17.3452	0.561656
0.0445804	0	17.7651	0.608473
0.0455718	0	19.6146	0.45916
0.0946083	7.928	8.678	1.18301
0.0880626	16.969	67.4957	0.688912
0.0965854	45.17	73.2182	1.00545
0.120285	44.385	85.1185	1.27465
0.159015	30.541	173.778	2.6302
0.168904	33.719	101.206	2.27884
0.175281	48.745	155.811	3.33305
0.19011	42.708	180.567	2.04534
0.233677	56.369	247.993	5.06878
0.206107	59.393	179.145	3.39503
0.192102	28.671	236.182	2.90827
0.180467	45.654	126.57	2.06334
0.15883	99.688	95.2483	2.15365
0.156614	37.298	174.71	4.28908
0.160695	46.564	233.328	4.01237
0.159609	54.173	162.055	2.18917
0.20202	111.175	107.899	4.06287
0.224352	144.177	122.861	3.7635
0.254587	94.875	271.667	5.5703
0.291815	164.839	371.839	6.99684
0.31733	113.991	432.077	9.96681
0.364397	164.991	306.687	12.1663
0.396088	133.168	586.65	15.373
0.454545	189.525	636.061	23.9875
0.469716	153.236	440.632	15.8597
0.532995	164.509	689.608	23.0607
0.561856	286.513	969.879	35.4643
0.468708	202.951	911.778	36.4283
0.367742	160.464	632.586	16.5198
0.34264	97.951	445.652	8.89423
0.332907	83.101	320.344	6.49518
0.338065	63.506	547.789	8.2876
0.401351	157.211	387.493	12.5064
0.422872	118.62	409.96	9.37707
0.440318	129.708	438.921	13.3567
0.483957	120.482	442.827	21.7444
0.449716	173.695	813.872	44.6243
AI: aridity index
ANPP:annual net primary productivity
MBC:microbial biomass carbon
SOC(g/kg Soil): soil organic carbon content
