# Supplementary material for: Aridity thresholds of soil microbial metabolic indices along a 3,200 km transect across arid and semi-arid regions in Northern China
Source: PeerJ. 2019 Apr 9;7:e6712. doi: 10.7717/peerj.6712 (PMC6461032; doi:10.7717/peerj.6712)
Supplement: Supplemental Information 6 — Variation and correlation patterns of the MBC:SOC ratio with aridity index (AI), soil organic carbon content (SOC), soil C:N ratio, and annual net primary productivity (ANPP) for soils from the 56 locations along the sampling transect. [file peerj-07-6712-s006.xlsx]

## Sheet: Sheet1
MBC:SOC(mg/g SOC)	AI	SOC(g/kg Soil)	C/N ratio	ANPP(g/m2)
11.1065	0.0949721	1.98428	0.0478622	8.891
22.4407	0.0309194	1.10385	0.0280105	0
106.827	0.0613254	0.648514	0.0945629	0
52.9609	0.0946372	2.00179	0.0472764	0
13.1671	0.0664845	2.34394	0.0283644	0
33.1818	0.042461	2.14631	0.0197833	0
31.7379	0.0368466	1.33797	0.0275392	0
83.0843	0.0299501	0.497435	0.060209	0
56.7184	0.0654582	1.15115	0.0568635	13.197
76.4243	0.0480427	0.953933	0.0503628	0
49.2672	0.0637488	0.6	0.106248	0
30.4786	0.0782123	1.33131	0.0587486	0
12.0636	0.0606061	0.742399	0.0816354	0
148.07	0.0366492	0.556613	0.0658433	0
44.3711	0.0295395	0.581344	0.0508125	0
42.896	0.0329575	0.6	0.0549292	0
30.8823	0.0441441	0.561656	0.0785964	0
29.1961	0.0445804	0.608473	0.0732661	0
42.7184	0.0455718	0.45916	0.0992504	0
7.33552	0.0946083	1.18301	0.0799725	7.928
97.9744	0.0880626	0.688912	0.127829	16.969
72.8214	0.0965854	1.00545	0.0960619	45.17
66.7779	0.120285	1.27465	0.0943673	44.385
66.0701	0.159015	2.6302	0.0604572	30.541
44.4112	0.168904	2.27884	0.0741184	33.719
46.7473	0.175281	3.33305	0.0525887	48.745
88.2822	0.19011	2.04534	0.0929477	42.708
48.9255	0.233677	5.06878	0.0461012	56.369
52.7667	0.206107	3.39503	0.0607083	59.393
81.2103	0.192102	2.90827	0.0660538	28.671
61.3426	0.180467	2.06334	0.0874637	45.654
44.2265	0.15883	2.15365	0.0737491	99.688
40.7337	0.156614	4.28908	0.0365146	37.298
58.1523	0.160695	4.01237	0.0400499	46.564
74.0259	0.159609	2.18917	0.0729085	54.173
26.5573	0.20202	4.06287	0.0497236	111.175
32.6454	0.224352	3.7635	0.0596125	144.177
48.7707	0.254587	5.5703	0.0457044	94.875
53.1439	0.291815	6.99684	0.0417067	164.839
43.3516	0.31733	9.96681	0.0318387	113.991
25.2078	0.364397	12.1663	0.0299512	164.991
38.1611	0.396088	15.373	0.0257652	133.168
26.5164	0.454545	23.9875	0.0189493	189.525
27.7831	0.469716	15.8597	0.0296169	153.236
29.904	0.532995	23.0607	0.0231126	164.509
27.348	0.561856	35.4643	0.0158429	286.513
25.0294	0.468708	36.4283	0.0128666	202.951
38.2927	0.367742	16.5198	0.0222607	160.464
50.1057	0.34264	8.89423	0.0385238	97.951
49.3202	0.332907	6.49518	0.0512544	83.101
66.0974	0.338065	8.2876	0.0407916	63.506
30.9837	0.401351	12.5064	0.0320918	157.211
43.7194	0.422872	9.37707	0.0450964	118.62
32.8614	0.440318	13.3567	0.032966	129.708
20.3651	0.483957	21.7444	0.0222566	120.482
18.2383	0.449716	44.6243	0.0100778	173.695
AI: aridity index
SOC(g/kg Soil): soil organic carbon content
Soil C/N ratio: the ratio of soil organic carbon to soil organic nitrogen content
ANPP:annual net primary productivity
